# Supplementary material for: Landslides Data Assimilation Using TRIGRS Based on Particle Filtering
Source: Copernicus journal article supplement (doi:10.5194/nhess-2019-16), 2019-02-12
Supplement: Supplementary file [file nhess-2019-16-AC4-supplement.zip]

## Particle filter algorithm process in this paper.

Step 1: Draw initial particles  $\{\mathbf{x}_0^i\}_{i=1}^N$  from prior PDF  $p(\mathbf{x}_0)$ .  $\mathbf{x}$  is the state vector. N is the number of particles.

Step 2: Compute the mean and variance of posterior particles at step  $k-1$ :

$$\bar{\mathbf{x}}_{k-1/k-1} = \frac{1}{N} \sum_{i=1}^N \mathbf{x}_{k-1/k-1}^i$$

$$\mathbf{D}_{k-1/k-1} = \frac{1}{N-1} \sum_{i=1}^N (\mathbf{x}_{k-1/k-1}^i - \bar{\mathbf{x}}_{k-1/k-1})(\mathbf{x}_{k-1/k-1}^i - \bar{\mathbf{x}}_{k-1/k-1})^T$$

Step 3: Using the new method in this section, compute the “gains” of particles:

$$\mathbf{D}_{k/k-1} = \left[ \frac{\partial f_k}{\partial \mathbf{x}_k}(\hat{\mathbf{x}}_k) \right] \mathbf{D}_{k-1/k-1} \left[ \frac{\partial f_k}{\partial \mathbf{x}_k}(\hat{\mathbf{x}}_k) \right]^T + \mathbf{G}_{k-1}(\hat{\mathbf{x}}_{k-1}) \mathbf{Q}_{k-1} \mathbf{G}_{k-1}^T(\hat{\mathbf{x}}_{k-1})$$

$$\mathbf{J}_k = \mathbf{D}_{k/k-1} \left[ \frac{\partial f_k}{\partial \mathbf{x}_k}(\hat{\mathbf{x}}_{k/k-1}) \right] \left\{ \left[ \frac{\partial f_k}{\partial \mathbf{x}_k}(\hat{\mathbf{x}}_{k/k-1}) \right] \mathbf{D}_{k/k-1} \left[ \frac{\partial f_k}{\partial \mathbf{x}_k}(\hat{\mathbf{x}}_{k/k-1}) \right]^T + \mathbf{R}_k \right\}^{-1}$$

Step 4: Transfer the particles close to the observation:

$$\mathbf{x}_k^i = f(\mathbf{x}_{k-1}^i) + \hat{\mathbf{e}}_{k-1} + \mathbf{J}_k [\mathbf{z}_k - h(\hat{\mathbf{x}}_{k-1})]$$

Step 5: Residual resampling. Each particle generates a set of normally-distributed progeny particles, and all progeny sets make up the resampled particle set:

$$\{\mathbf{x}_k^{i1}, \mathbf{x}_k^{i2}, \dots, \mathbf{x}_k^{iACT_i}\} = \mathbf{X}_k^{iACT_i} \sim N(\mathbf{x}_k^i, \mathbf{G}_k(\mathbf{x}_k^i))$$

$$\{\mathbf{X}_k^{1ACT_1}, \mathbf{X}_k^{2ACT_2}, \dots, \mathbf{X}_k^{NACT_N}\} = \{\mathbf{x}_k^{*i}\}_{i=1,2,\dots,N}$$

When  $ACT_i = 0$ ,  $\mathbf{X}_k^{iACT_i}$  is an empty set.

Step 6: Compute and normalize weights:

$$\tilde{w}_k^i = w_{k-1}^i \cdot p(\mathbf{z}_k | \mathbf{x}_k^i)$$

$$w_k^i = \frac{\tilde{w}_k^i}{\sum_{j=1}^N \tilde{w}_k^j}$$

Step 7: Compute the state estimation:

$$\hat{\mathbf{x}}_{k/k} = \sum_{i=1}^N \mathbf{x}_k^{*i} \cdot w_k^i$$

A measure to assess the accuracy of calculation is the root mean square difference (RMSD), which is defined as

$$RMSD = \sqrt{\frac{1}{T} \sum_{t=1}^T (\hat{X}_t - X_t^{obs})^2}$$

where  $T$  is the period of assimilation,  $\hat{X}_t$  and  $X_t^{obs}$  are the assimilated value and the observation of state at time  $t$ , respectively.
